# Supplementary material
Source: bioRxiv or medRxiv preprint supplement (https://medrxiv.org/content/medrxiv/early/2021/09/28/2021.09.24.21263620/DC1/embed/media-1.pdf)
Supplement: Supplementary file [file media-1.pdf]

## 1 Supplementary Table 1: Patient characteristics.

| Variables                      | Value            | n (%)      |
|--------------------------------|------------------|------------|
| Number of patients             |                  | 491        |
| Age at time of surgery (years) | Median [min-max] | 69 [61-76] |
|                                | ≤65              | 188 (38.3) |
|                                | >65              | 303 (61.7) |
| Sex                            | Male             | 329 (67.0) |
|                                | Female           | 162 (33.0) |
| Histologic type                | Differentiated   | 270 (55.0) |
|                                | Undifferentiated | 221 (45.0) |
| Stage (TNM7 <sup>b</sup> )     | IB               | 116 (23.6) |
|                                | IIA              | 86 (17.5)  |
|                                | IIB              | 116 (23.6) |
|                                | IIIA             | 65 (13.2)  |
|                                | IIIB             | 64 (13.0)  |
|                                | IIIC             | 44 (9.0)   |
| <i>Helicobacter pylori</i>     | +                | 175 (35.6) |
|                                | -                | 316 (64.4) |
| Modality                       | Surgery + S-1    | 176 (35.8) |
|                                | Surgery only     | 315 (64.1) |
| S-1 reduction                  | +                | 82 (46.6)  |
|                                | -                | 94 (53.4)  |

2

TMN7<sup>b</sup>, TMN Classification of Malignant Tumours-7th edition

3

1 Supplementary Table 2: Concordance rate between IHC of MMR and MSI analysis status

| Immunohistochemistry of MMR | Microsatellite status |                      |           |
|-----------------------------|-----------------------|----------------------|-----------|
|                             | MSI <sup>+</sup> (%)  | MSI <sup>-</sup> (%) | Total (%) |
| dMMR                        | 1 (1.2)               | 6 (7.1)              | 7 (8.3)   |
| pMMR                        | 8 (9.5)               | 69 (82.1)            | 77 (91.7) |
| Total                       | 9 (10.8)              | 75 (89.2)            | 84        |

2

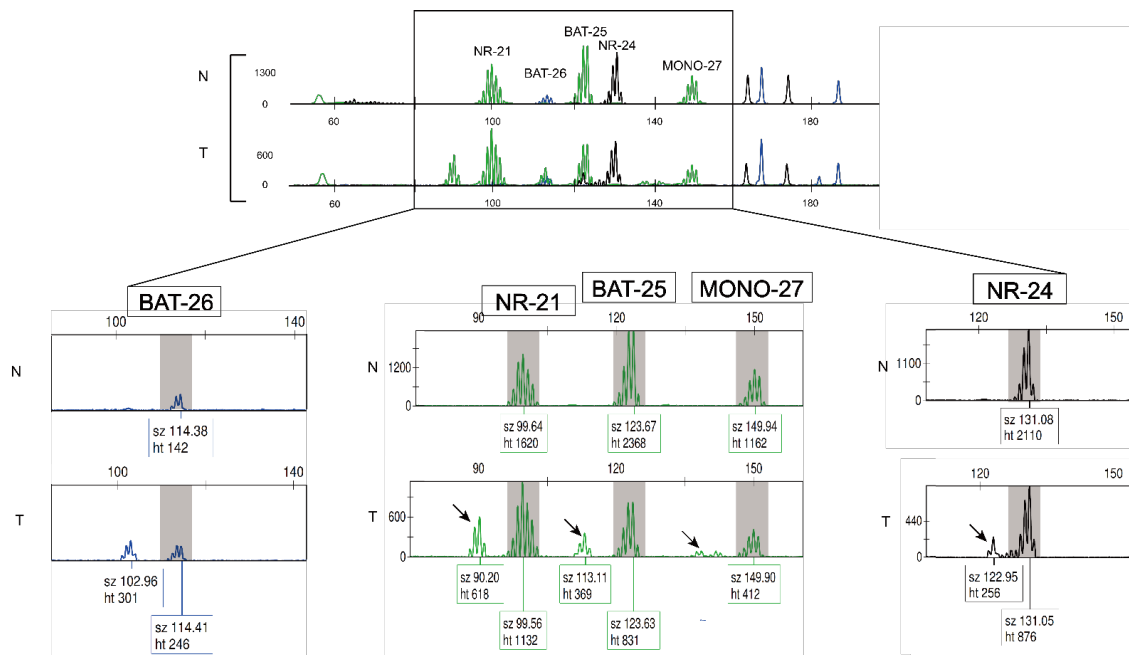

1 Supplementary Figure 1: MSI analysis. Tumors showing allelic shifts in  $\geq$  one of five  
 2 markers (BAT-26, NR-21, BAT-25, MONO-27, and NR-24) were defined as MSI<sup>+</sup>  
 3 (hereafter referred to as MSI) and the rest were defined as MSI<sup>-</sup>. MSI is shown in black  
 4 arrows. N; normal tissue, T; tumor tissue. BAT-26 is represented as a blue line. NR-21,  
 5 BAT-25, and MONO-27 are represented as a green line. NR-24 is represented as a black  
 6 line.

7

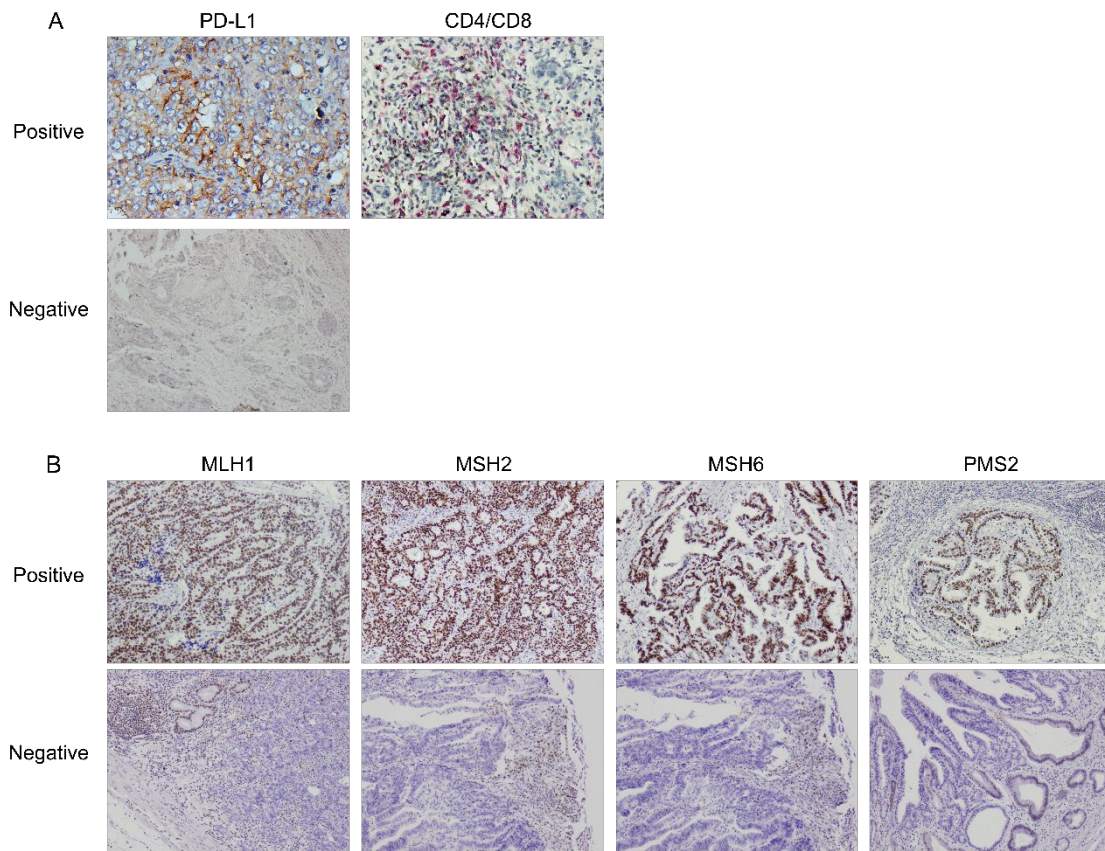

1 Supplementary Figure 2: IHC of PD-L1,CD4/CD8, and MMR proteins staining pattern  
2 (A) Representative IHC staining of PD-L1, CD4, and CD8. Magnification,  $\times 200$ . (B)  
3 Representative IHC staining of MMR proteins, including MLH1, MSH2, MSH6,  
4 and PMS2,  $\times 200$ .  
5

## 1 **Supplementary Methods**

2 FFPE tissue section slides were deparaffinized in 2 changes of xylene for 15 minutes each,  
3 followed by rehydration in an ethanol gradient (100% ethanol, 95% ethanol, 70% ethanol,  
4 and water). Antigen retrieval was performed in a 95°C water bath with Envision FLEX  
5 low pH antigen retrieval solution (1x) (20 minutes pre-heat, 20 minutes heat, and 20  
6 minutes cool).

### 7 8 **IHC of PD-L1**

9 Deparaffinization, rehydration, and antigen retrieval were performed on PT Link (PT100,  
10 Dako, Santa Clara, CA, USA) using the EnVision™ FLEX Target Retrieval Solution, at  
11 low pH 6.0 for 53 minutes at room temperature. Following FLEX peroxidase block for 5  
12 minutes, specimens were incubated with primary mouse anti-PD-L1 monoclonal  
13 antibody (M365329; Dako, Santa Clara, CA, USA), using a concentration of 1:50 for 60  
14 minutes at room temperature. Specimens were then incubated with the EnVision™  
15 FLEX+ Mouse LINKER for 30 minutes at room temperature, followed by incubation  
16 with the EnVision™ FLEX hprseradish peroxidase (HRP) visualization reagent for 30  
17 minutes at room temperature. The enzymatic conversion of the subsequently added 3,3'-  
18 diaminobenzidine tetrahydrochloride (DAB) chromogen for 10 minutes at room  
19 temperature followed by DAB enhancer for 5 minutes at room temperature resulted in  
20 precipitation of a visible reaction product at the site of antigen. The specimens were then  
21 counterstained with haematoxylin and coverslipped. All steps were followed by buffer  
22 washes for 5 minutes each (EnVision™ FLEX Wash Buffer 20x).

### 23 24 **IHC of CD4/CD8**

25 An anti-CD4/CD8 primary antibody cocktail was added for 30 minutes. Slides were  
26 rinsed twice in buffer and the dual anti-mouse/anti-rabbit secondary detection system  
27 (MACH2 polymer) was added for 30 minutes. The slides were then rinsed twice in buffer  
28 prior to detection with Betazoid DAB chromagen for 5 minutes (CD4+ cells), followed  
29 by a water rinse, a buffer rinse, and Warp Red chromagen for 7 minutes (CD8+ cells).  
30 Slides were counterstained in Mayer's Hematoxylin (Sigma-Aldrich, St. Louis, NI, USA)  
31 and Scott's Tap Water Substitute, with a final rinse in water, and dried at 60°C for 15  
32 minutes, followed by rinsing in xylene. Antigen retrieval was performed in a 95°C water  
33 bath with Envision FLEX low pH antigen retrieval solution (1x) (20 minutes pre-heat, 20  
34 minutes heat, and 20 minutes cool). The tissue sections were stained on a machine  
35 (Autostainer Link 48, Dako, Santa Clara, CA, USA) following manufacturer's  
36 instructions, with the following modification: DAB chromogen was applied once to

1 the tissue sections for 10 minutes. Slides were then counterstained in Mayer's  
2 Hematoxylin and Scott's Tap Water Substitute, with a final rinse in water and allowed to  
3 air dry.

#### 4 5 **IHC of MMR**

6 MMR IHC was conducted on 3 µm-thick representative paraffin sections. The sections  
7 were deparaffinized in xylene and dehydrated. Immunostaining was performed for each  
8 protein. Endogenous peroxidase activity was inhibited by incubating the sections in 3%  
9 H<sub>2</sub>O<sub>2</sub> for 20 minutes. Antigen retrieval was required for all antibodies and consisted of  
10 microwave treatment of sections for 20 minutes in citrate buffer (pH 7.0) in a microwave  
11 oven at 300 W (H2500, Microwave Processor, Bio Rad, Hercules, CA, USA) as  
12 previously described (54). The DAKO EnVision+ system [dextran polymers conjugated  
13 with HRP; (DAKO, Santa Clara, CA, USA)] was used to examine immunohistochemical  
14 expression of these markers. Negative control staining was conducted with a routine  
15 method using the DAKO EnVision+ system (Dako, Santa Clara, CA, USA) according to  
16 the manufacturer's instructions.
